# Supplementary material for: From free text to clusters of content in health records: an unsupervised graph partitioning approach
Source: PubMed Central journal article supplement (PMC6400329; doi:10.1007/s41109-018-0109-9), 2019-01-24

# 17 communities

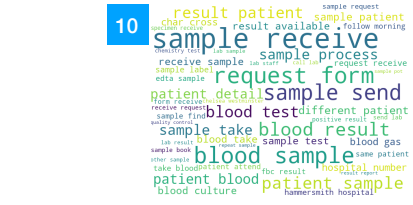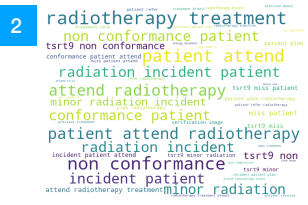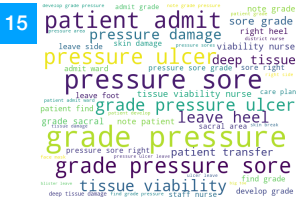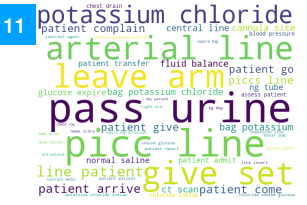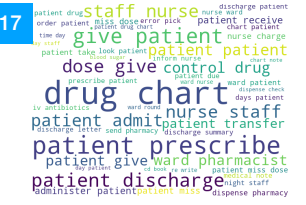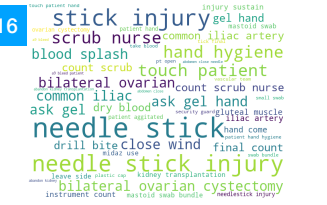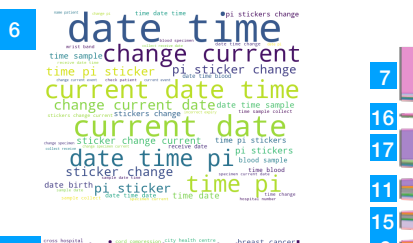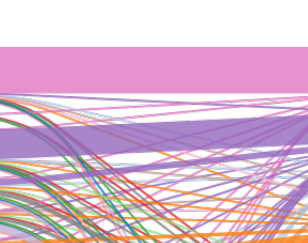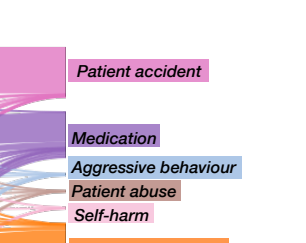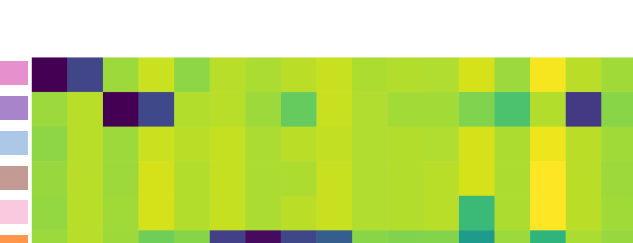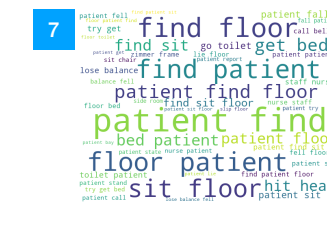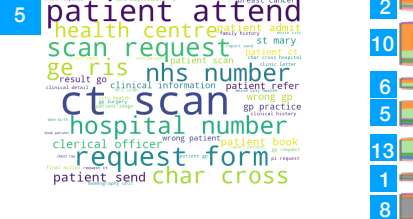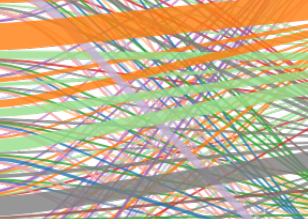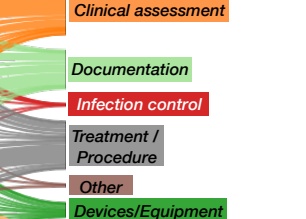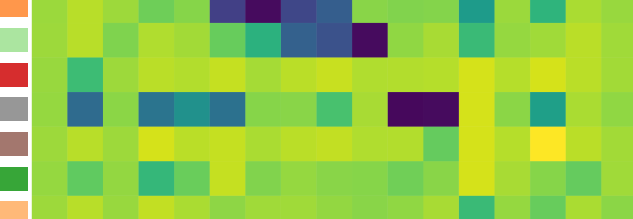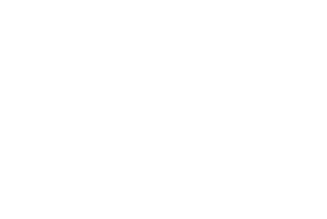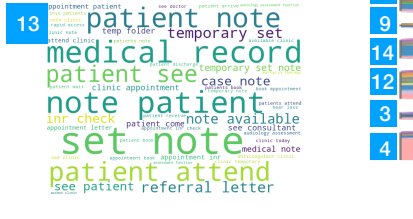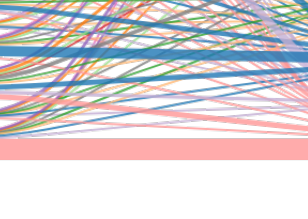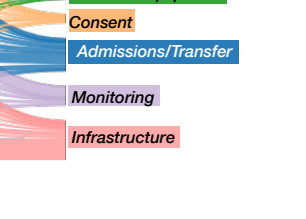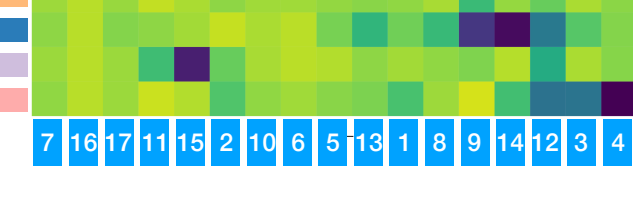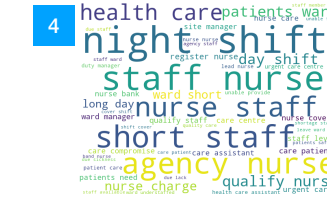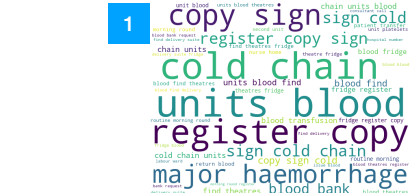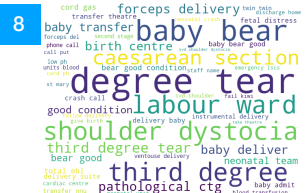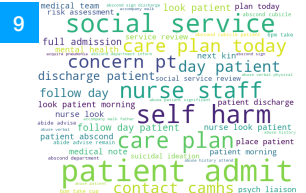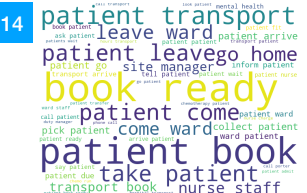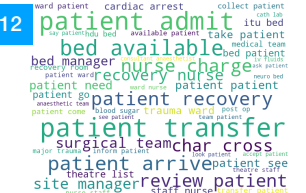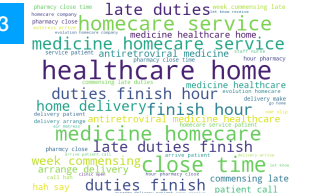

Supplement: 41109_2018_109_MOESM2_ESM.pdf [file 41109_2018_109_MOESM2_ESM.pdf]
